# Supplementary material for: Phylogenetic Revisit to a Review on Predatory Bacteria
Source: MDPI journal article supplement (doi:10.3390/microorganisms11071673), 2023-06-27
Supplement: s1 [file s1]

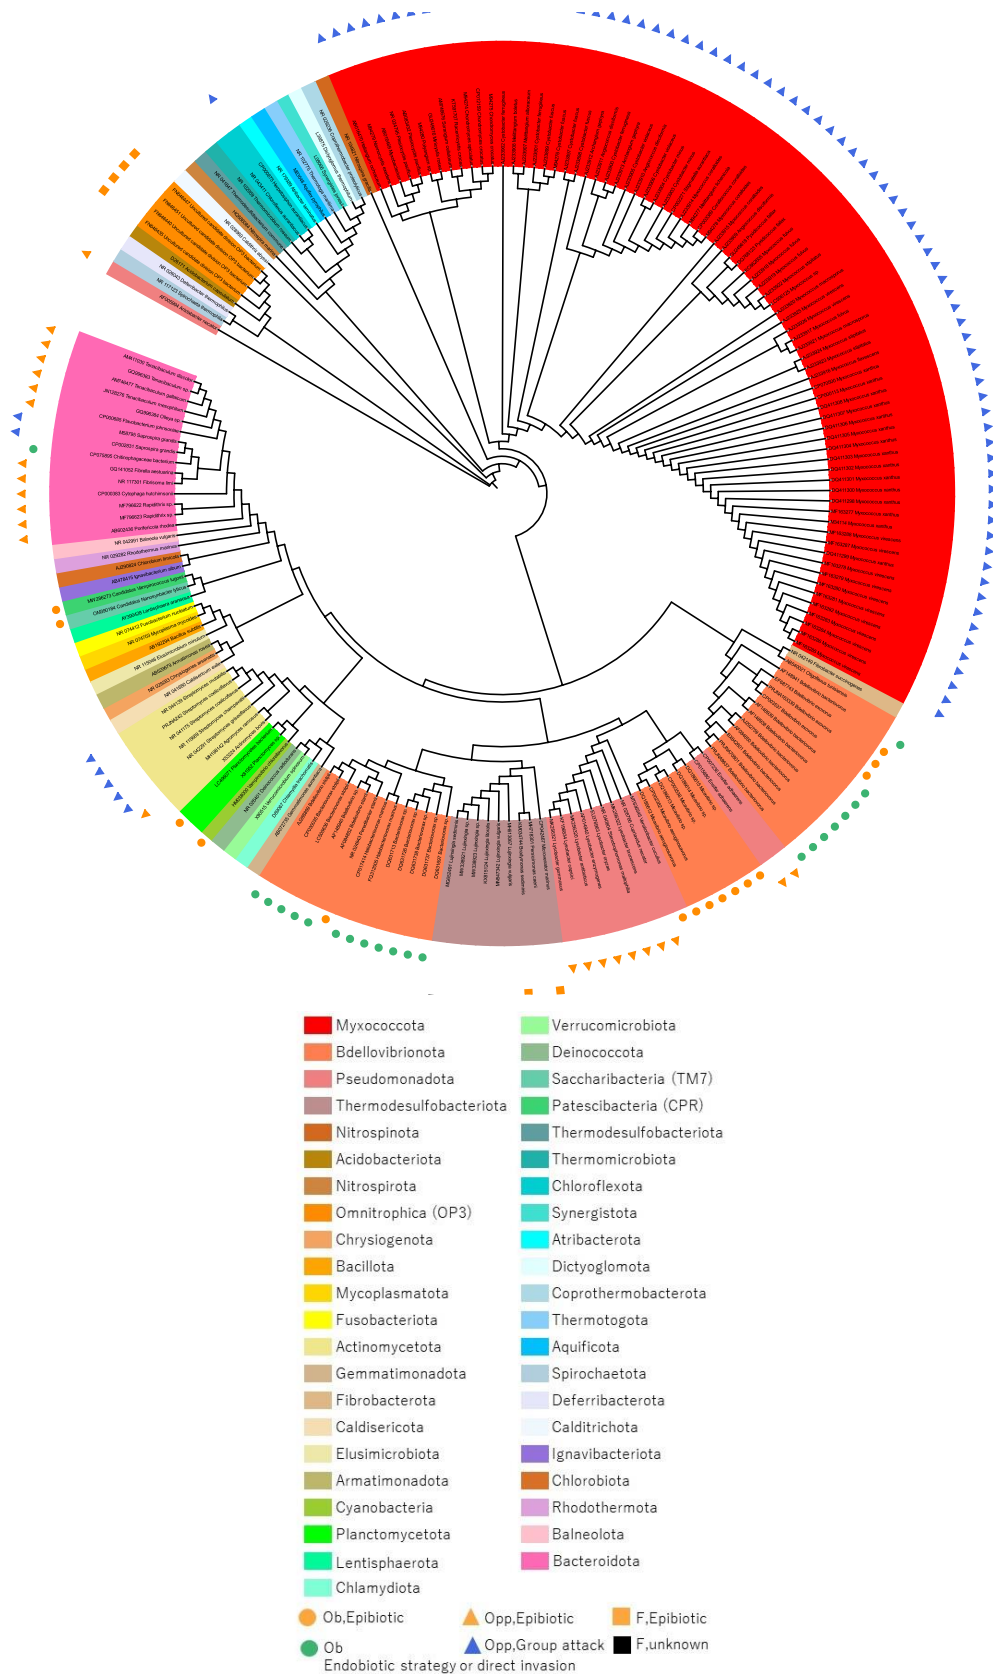

**Figure S1.** Trans-phyllum phylogenetic tree of 135 (about 0.6 kb) sequences of predatory bacterial 16S rRNA genes listed in Table S1 [4,18,20,31,37,42,47,49,50,61,69-120] and 35 sequences from representative, current and former bacterial phyla listed in Table S2 [121-154]. Predation properties are indicated by the symbols as: ● obligate, epibiotic; ● obligate, endobiotic or direct invasion; ▲, opportunistic, epibiotic; ▲, opportunistic, group attack; ■, facultative, epibiotic; and, ■, facultative, unknown.

Figure S1 (0.6 kb-long 16S-tree) includes the shortest sequence of “MW286273 *Vampirococcus lugosii*” [37] at about 8:30, neighbored with “OM390184 *Nanosynbacter lyticus*” [31]. Different from Figure 1, Figure S1 placed the non-predatory “NR\_042149 *Fibrobacter succinogenes*” [140] clustered with “AB540021 *Oligoflexus tunisiensis*” [128] that is predicted predatory [3] but yet-unconfirmed (Nakai, pers. comm.). These inconsistencies may be a hint for hunting novel predatory bacteria.
